# Supplementary material
Source: PubMed Central journal article supplement (PMC8488014)

# DNMT1 Western Blot (Extended Data Figure 4e)

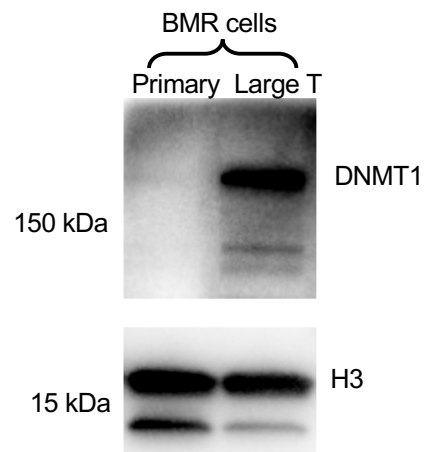

Supplement: NIHMS1732718-supplement-unprocessed_immunoblot_Extended_Data_Figure_4.pdf [file NIHMS1732718-supplement-unprocessed_immunoblot_Extended_Data_Figure_4.pdf]

# Chk2/p53 Western Blot (Extended Data Figure 5c)

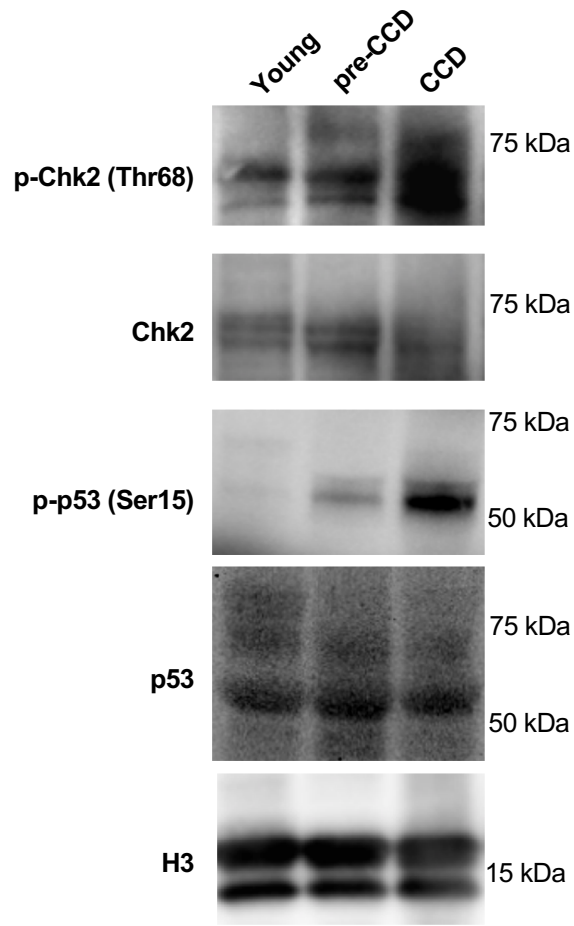

Supplement: NIHMS1732718-supplement-unprocessed_immunoblot_Extended_Data_Figure_5.pdf [file NIHMS1732718-supplement-unprocessed_immunoblot_Extended_Data_Figure_5.pdf]

## cGAS Western Blot (Extended Data Figure 6e)

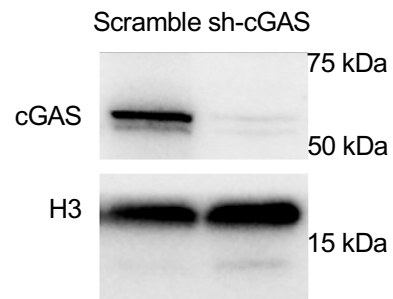

## STING Western Blot (Supplementary Figure 6f)

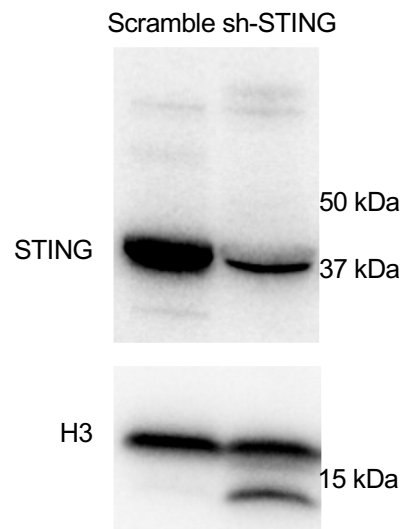

Supplement: NIHMS1732718-supplement-unprocessed_immunoblot_Extended_Data_Figure_6.pdf [file NIHMS1732718-supplement-unprocessed_immunoblot_Extended_Data_Figure_6.pdf]

## DNMT1 Western Blot (Extended Data Figure 7a)

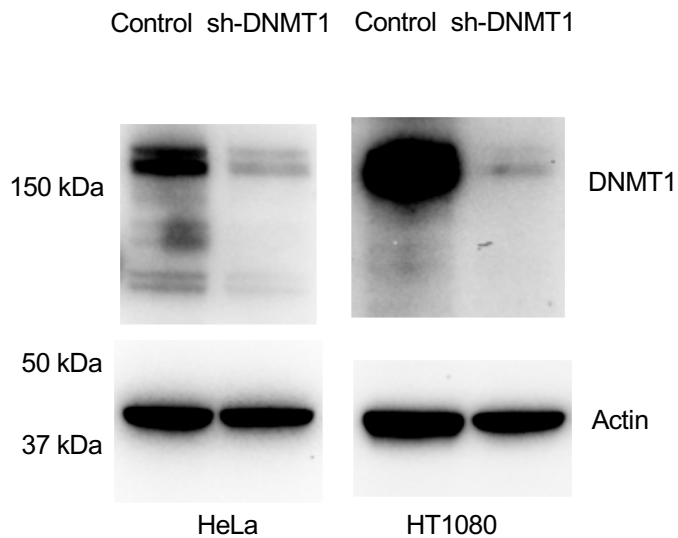

## L1 ORFeus Western Blot (Supplementary Figure 7g)

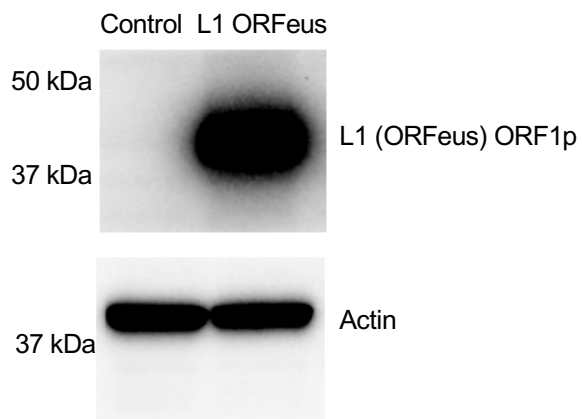

Supplement: NIHMS1732718-supplement-unprocessed_immunoblot_Extended_Data_Figure_7.pdf [file NIHMS1732718-supplement-unprocessed_immunoblot_Extended_Data_Figure_7.pdf]

# MX1 Western Blot (Figure 1e)

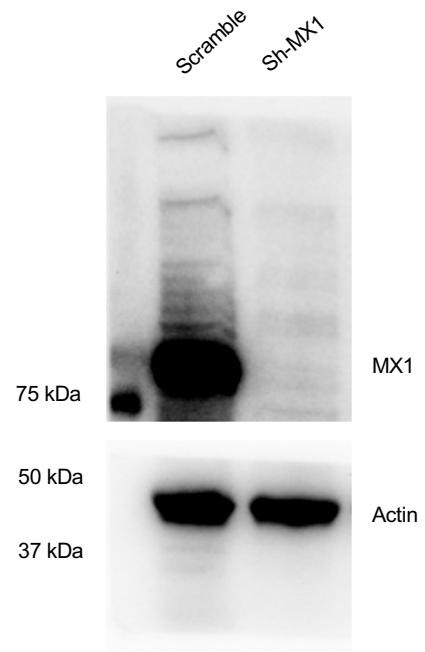

Supplement: NIHMS1732718-supplement-unprocessed_immunoblot_Figure_1.pdf [file NIHMS1732718-supplement-unprocessed_immunoblot_Figure_1.pdf]

# L1 ORF1p Western Blot (Figure 2e)

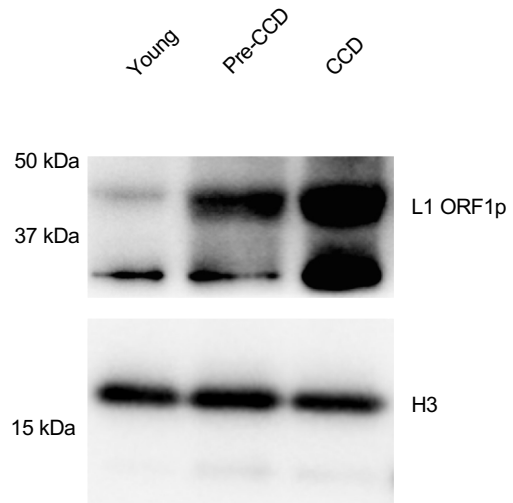

Supplement: NIHMS1732718-supplement-unprocessed_immunoblot_Figure_2.pdf [file NIHMS1732718-supplement-unprocessed_immunoblot_Figure_2.pdf]

## DNMT1 Western Blot (Figure 3e)

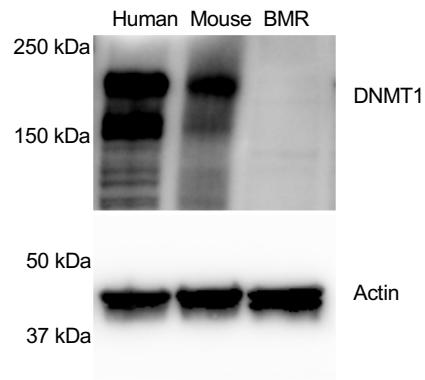

## DNMT1 Western Blot (Figure 3f)

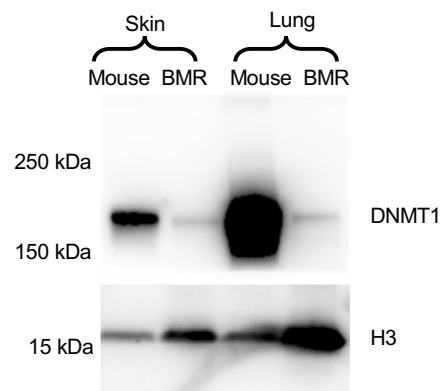

## DNMT1 Western Blot (Figure 3g)

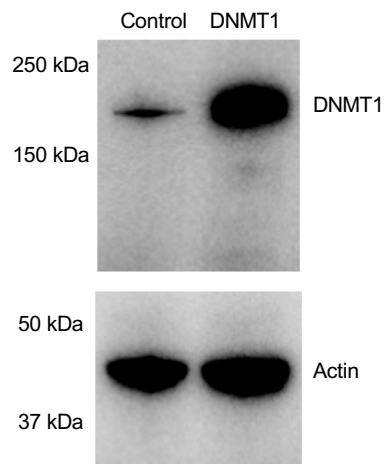

Supplement: NIHMS1732718-supplement-unprocessed_immunoblot_Figure_3.pdf [file NIHMS1732718-supplement-unprocessed_immunoblot_Figure_3.pdf]

## STING and p65 Western Blot (Figure 4c)

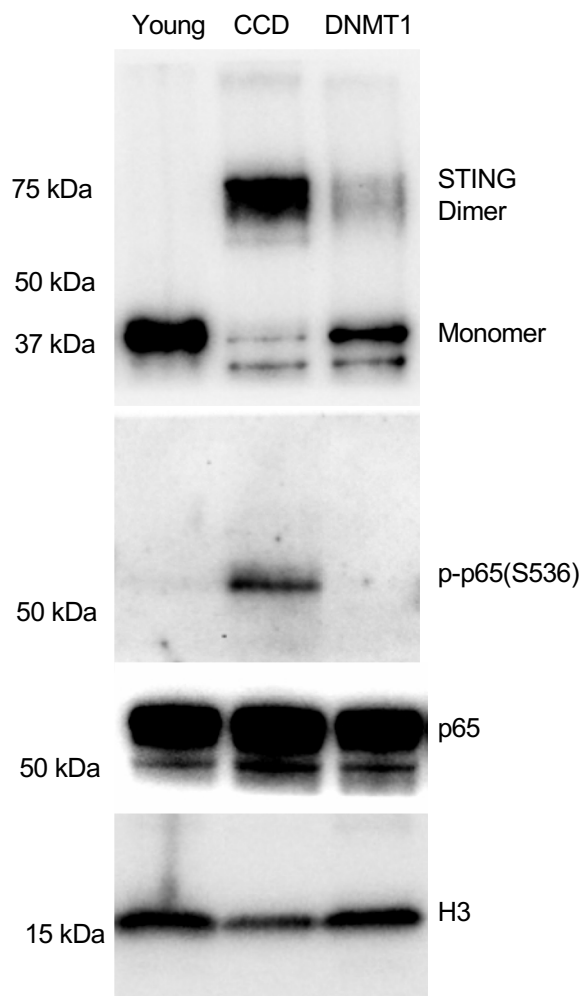

## STING dimer Western Blot (Figure 4h)

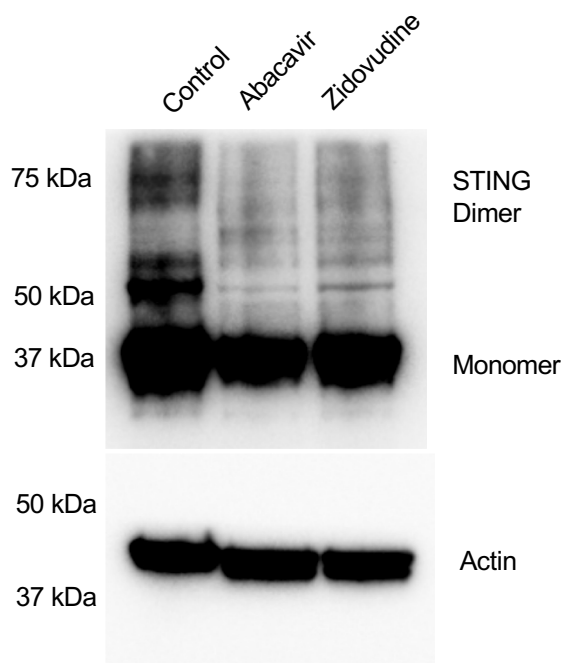

Supplement: NIHMS1732718-supplement-unprocessed_immunoblot_Figure_4.pdf [file NIHMS1732718-supplement-unprocessed_immunoblot_Figure_4.pdf]

# DNMT1 Western Blot (Figure 6a)

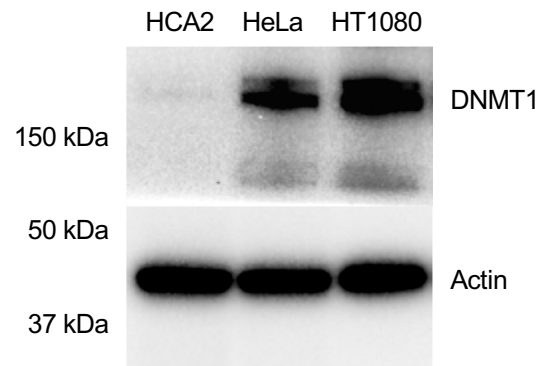

Supplement: NIHMS1732718-supplement-unprocessed_immunoblot_Figure_6.pdf [file NIHMS1732718-supplement-unprocessed_immunoblot_Figure_6.pdf]
